# Supplementary material for: Electronic interaction between platinum nanoparticles and nitrogen-doped reduced graphene oxide: effect on the oxygen reduction reaction
Source: Royal Society of Chemistry journal article supplement (doi:10.1039/c5ta01285f), 2015-01-01
Supplement: c5ta01285f1.pdf [file c5ta01285f1.pdf]

# Electronic Interaction between Platinum Nanoparticles and Nitrogen-doped Reduced Graphene Oxide: Effect on the Oxygen Reduction Reaction

Jiwei Ma,<sup>a,d</sup> Aurélien Habrioux,<sup>a</sup> Yun Luo,<sup>a</sup> Guadalupe Ramos-Sanchez,<sup>b</sup> Laura Calvillo,<sup>c</sup> Gaetano Granozzi,<sup>c</sup> Perla B. Balbuena,<sup>b</sup> and Nicolas Alonso-Vante<sup>a,\*</sup>

<sup>a</sup> IC2MP, UMR-CNRS 7285, University of Poitiers, 4 rue Michel Brunet, 86022 Poitiers, France

<sup>b</sup> Department of Chemical Engineering, Texas A&M University, College Station, TX 77843, United States

<sup>c</sup> Department of Chemical Sciences, University of Padova, Via Marzolo 1, 35131 Padova, Italy

<sup>d</sup> Faculty of Materials Science and Engineering, Hubei University, 430062 Wuhan, China

## Supplementary Information

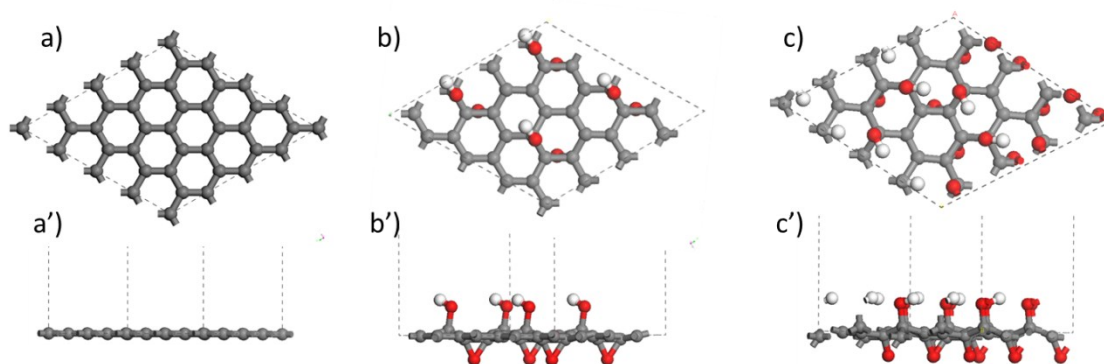

Figure S1. Top and side views of a) 4x4 graphene sheet, b) LOG and c) HOG.

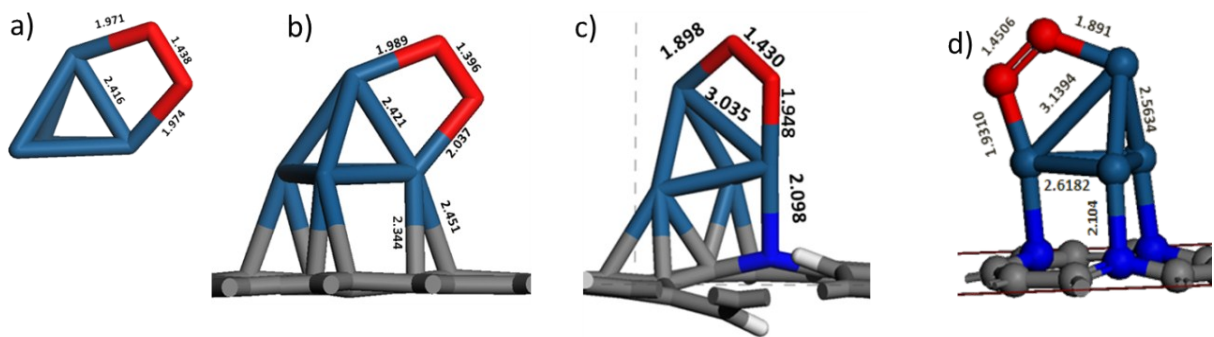

Figure S2. Interaction of molecular Oxygen with Pt<sub>4</sub> a) unsupported, b) Graphene supported, c) Graphene 1N doped and d) Graphene 3N doped. Pt-C distances shown after O<sub>2</sub> adsorption are larger than those previous to O<sub>2</sub> adsorption shown in Table 6.

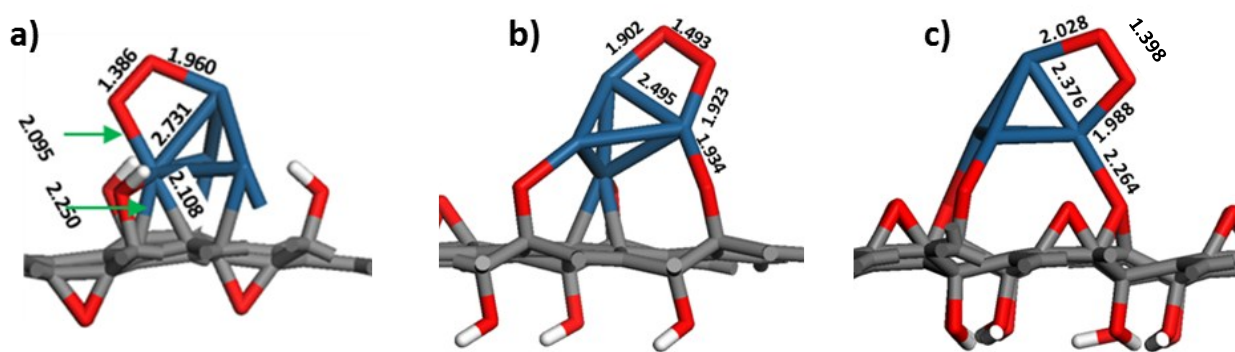

Figure S3. Interaction of molecular Oxygen with Pt<sub>4</sub> supported on a) LOG in the OH side, b) LOG in the epoxy side and c) HOG in the epoxy side.

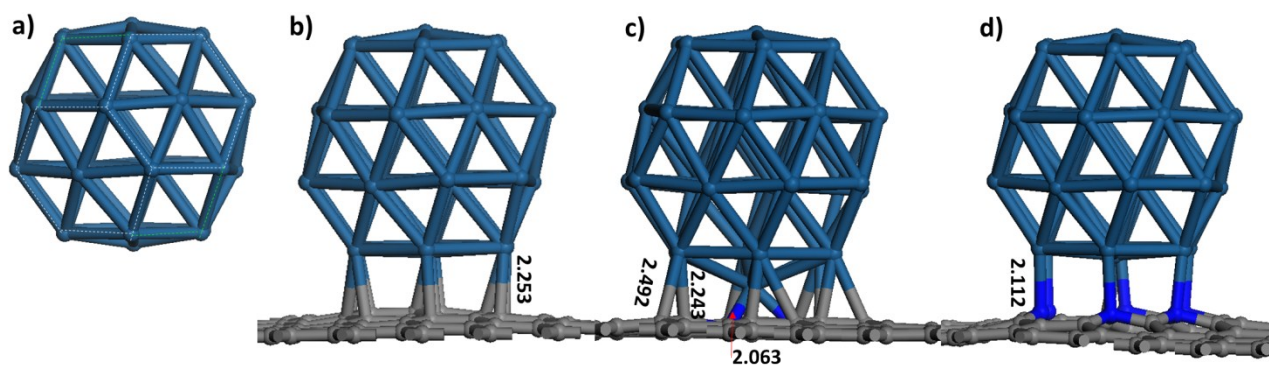

Figure S4. Pt<sub>38</sub> clusters interacting with the support; a) unsupported, b) supported on graphene, c) supported on G-3N and d) supported on G-6N.

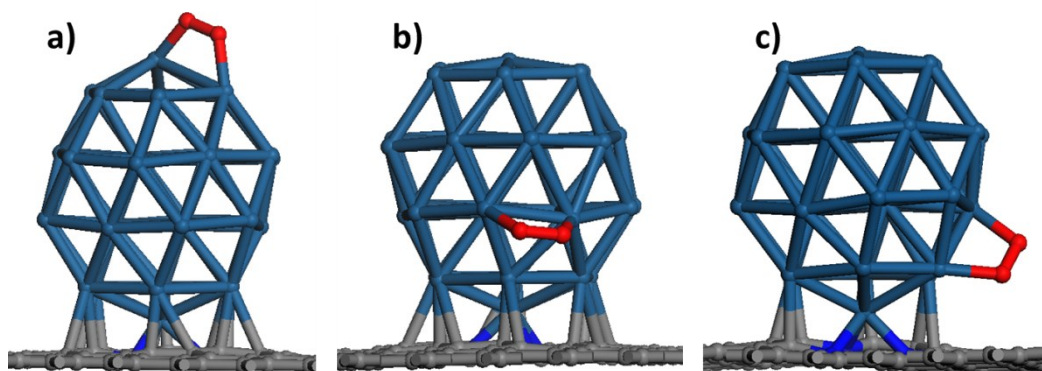

Figure S5. Position of molecular oxygen interacting with the Pt<sub>38</sub> cluster supported in N3-doped graphene. a) top position, b) middle position and c) interface position.

Table S1. Calculated lattice parameters (LP) and Bader electronic charges of the supports in this study. Parenthesis values represent Bader charges per atom or functional group.

|                 | LP / Å | Bader Charges (e) |                  |                  |       |
|-----------------|--------|-------------------|------------------|------------------|-------|
|                 |        | G                 | O                | OH               | N     |
| <b>Graphene</b> | 9.87   | 0.0<br>(±0.1)     |                  |                  |       |
| <b>LOG</b>      | 9.98   | 5.05<br>(±0.07)   | -3.14<br>(-0.79) | -1.91<br>(-0.48) |       |
| <b>HOG</b>      | 10.01  | 10.4<br>(±0.06)   | -6.57<br>(-0.82) | -3.87<br>(-0.48) |       |
| <b>G-1N</b>     | 9.87   | 1.22<br>(±0.1)    |                  |                  | -1.22 |
| <b>LOG-1N</b>   | 9.98   | 6.29<br>(±0.09)   | -3.15<br>(-0.79) | -1.90<br>(-0.48) | -1.24 |
| <b>HOG-1N</b>   | 10.01  | 11.5<br>(±1.1)    | -7.73<br>(-0.97) | -2.77<br>(-0.34) | -0.95 |
| <b>G-3N</b>     | 9.858  | 3.20<br>(±0.1)    |                  |                  | -3.20 |

Table S2. DFT calculated lattice parameter (LP) and overall electronic charge of the support before and after deposition of Pt<sub>38</sub> over the support. Two values of interaction energy between cluster and support ( $E_{int}$ ) are reported in each case separated by a slash: the first was calculated without considering deformation of cluster and support and the second includes such deformation effect.

|                        | Support |            |       | Pt <sub>38</sub> -Over Support |            |       |        |
|------------------------|---------|------------|-------|--------------------------------|------------|-------|--------|
|                        | LP (Å)  | Charge (e) |       | $E_{int}$ (eV)                 | Charge (e) |       |        |
|                        |         | G          | N     |                                | G          | N     | Pt     |
| <b>Pt<sub>38</sub></b> |         |            |       |                                | -          | -     | 0.0    |
| <b>C6x6</b>            | 17.281  | 0          | -     | 0.07/-1.38                     | 0.084      |       | -0.084 |
| <b>C6x6-3N</b>         | 17.273  | +3.62      | -3.62 | -1.51/-3.93                    | 2.75       | -2.96 | 0.16   |
| <b>C6x6-6N</b>         | 17.243  | +6.83      | -6.83 | -3.23/-4.6                     | 5.68       | -6.15 | 0.48   |
